# Supplementary material
Source: HighWire-hosted journal article supplement (https://bmjopen.bmj.com/content/6/9/e011168)

Supplement Figure 1. Trial profile. ITT: Intention-to-treat.

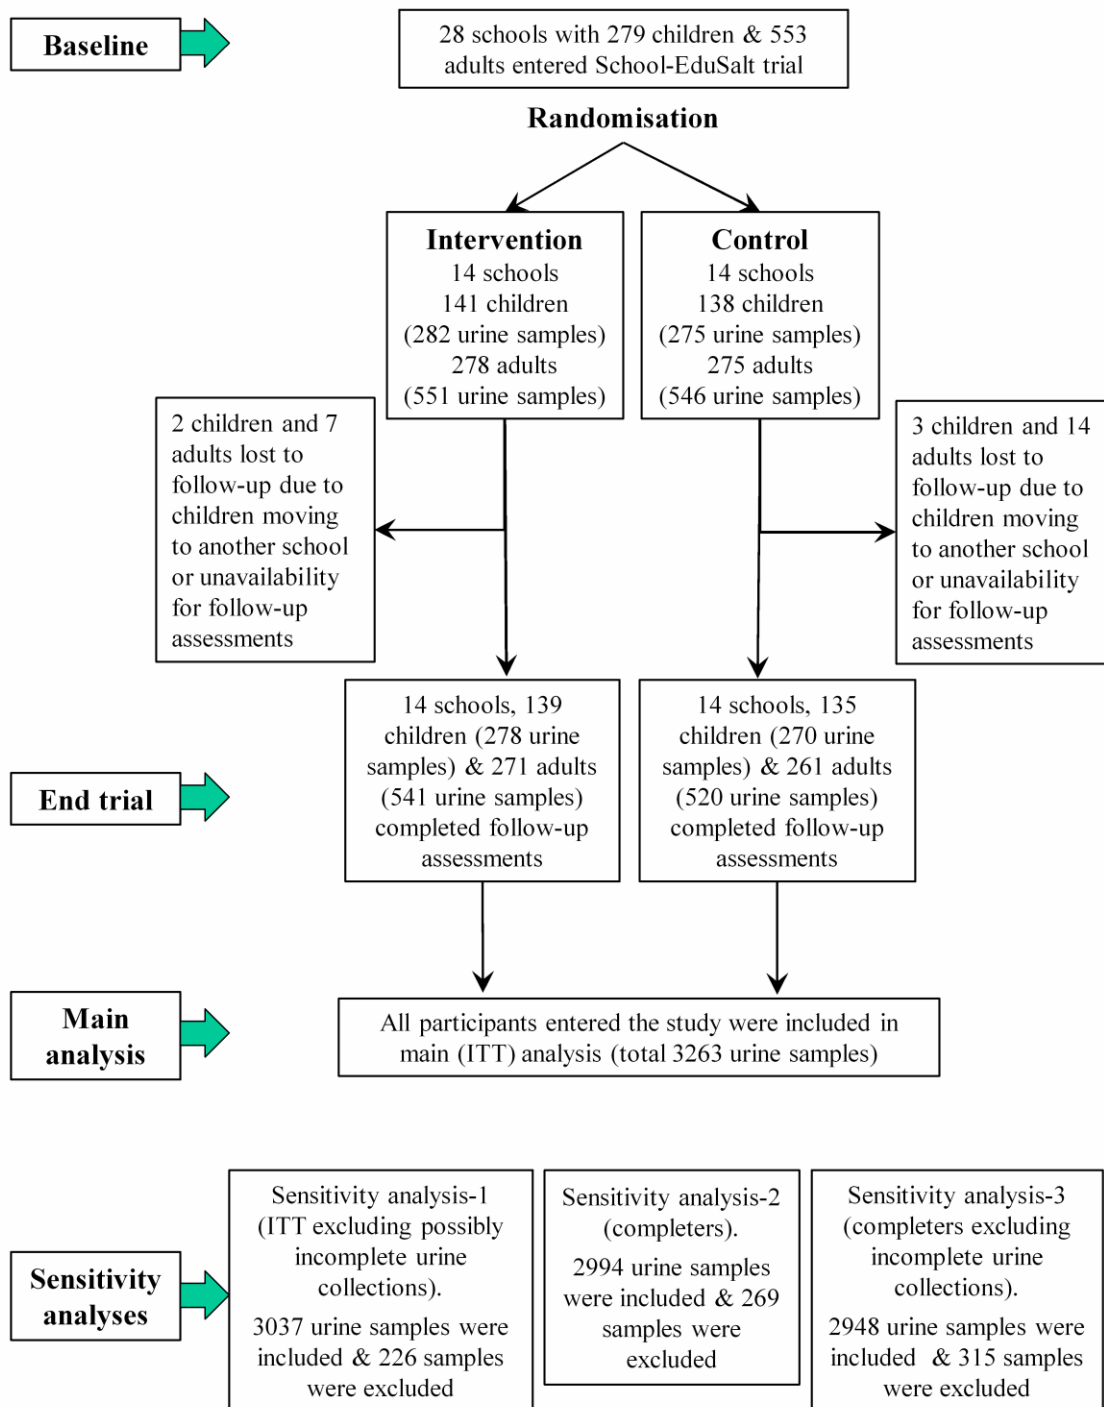

Supplement: inline-supplementary-material-1 [file inline-supplementary-material-1.pdf]
